# Supplementary material for: FusC, a member of the M16 protease family acquired by bacteria for iron piracy against plants
Source: PLOS journal article supplement (doi:10.1371/journal.pbio.2006026), 2018-08-02

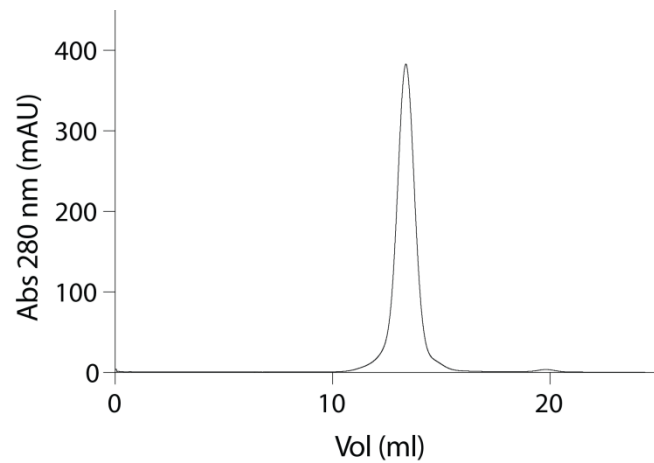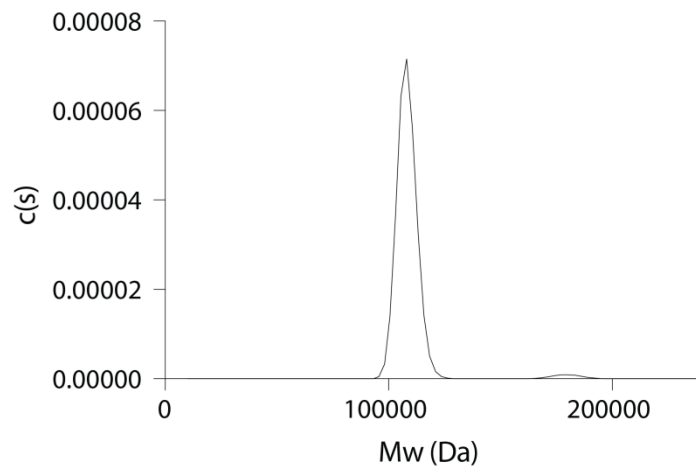

Supplement: S2 (10.1371/journal.pbio.2006026.s002) [file journal.pbio.2006026.s002]
