# Supplementary material for: FusC, a member of the M16 protease family acquired by bacteria for iron piracy against plants
Source: PLOS journal article supplement (doi:10.1371/journal.pbio.2006026), 2018-08-02

A

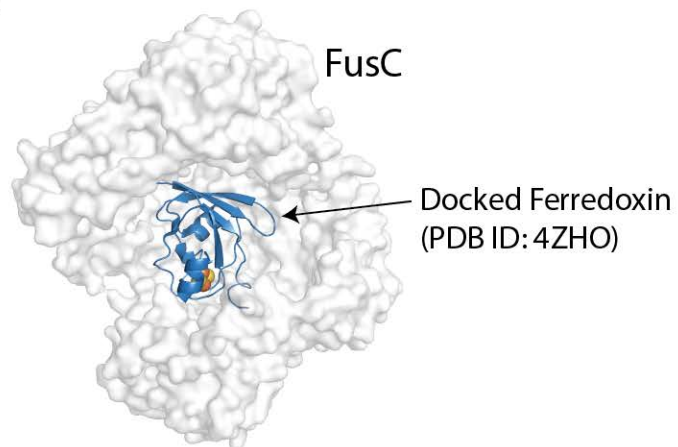

B

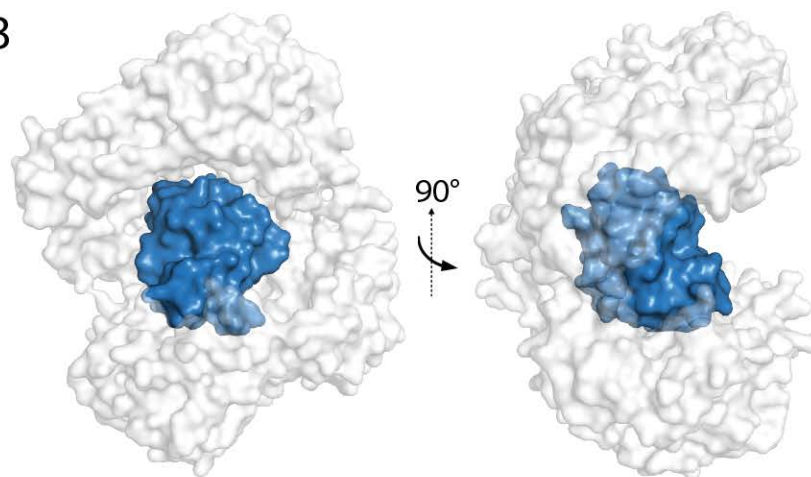

C

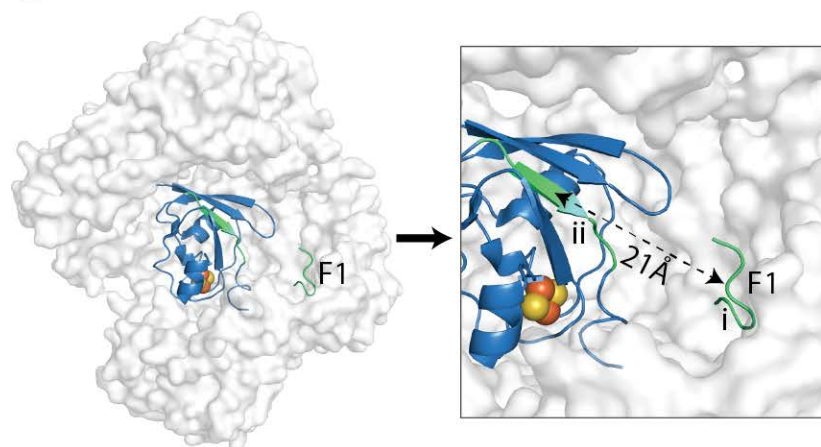

Supplement: S5 (10.1371/journal.pbio.2006026.s005) [file journal.pbio.2006026.s005]
